# Supplementary material for: Boosting the photon absorption, exciton dissociation, and photocatalytic hydrogen- and oxygen-evolution reactions by built-in electric fields in Janus platinum dichalcogenides
Source: Royal Society of Chemistry journal article supplement (doi:10.1039/d1tc03628a), 2021-01-01
Supplement: d1tc03628a1.pdf [file d1tc03628a1.pdf]

## Supplementary Information

### **Boosting photon absorption, exciton dissociation, and photocatalytic hydrogen and oxygen evolution reactions by build-in electric fields in Janus platinum dichalcogenides**

Xu Gao<sup>1,‡</sup>, Yanqing Shen<sup>1,‡,\*</sup>, Jiajia Liu<sup>1</sup>, Lingling Lv<sup>1</sup>, Min Zhou<sup>1</sup>, Zhongxiang Zhou<sup>1</sup>, Yuanping Feng<sup>2</sup>, Lei Shen<sup>3,\*</sup>

<sup>1</sup> *School of Physics, Harbin Institute of Technology, Harbin 150001, PR China*

<sup>2</sup> *Department of Physics, National University of Singapore, Singapore 117551*

<sup>3</sup> *Department of Mechanical Engineering, National University of Singapore, Singapore 117575*

\*Corresponding author: Yanqing Shen, E-mail: shenyanqing2004@163.com; Lei

Shen, E-mail: shenlei@nus.edu.sg

## Table of Content

|                                                |    |
|------------------------------------------------|----|
| 1. Structural stability.....                   | 1  |
| 1.1 Thermal stability .....                    | 1  |
| 1.2 Mechanical stability .....                 | 2  |
| 2. Band gaps of Janus PtXY .....               | 4  |
| 3. Solar-to-hydrogen efficiency .....          | 5  |
| 4. Details of band alignments .....            | 10 |
| 5. Electrostatic potential of Janus PtXY ..... | 11 |
| 6. Exciton Binding Energy .....                | 12 |
| 7. Carrier mobility .....                      | 14 |
| 8. Adsorption of water molecule.....           | 17 |
| 9. Gibbs free energy.....                      | 18 |
| 10. Theoretical calculation models .....       | 21 |
| References .....                               | 23 |

# 1. Structural stability

## 1.1 Thermal stability

**Fig. S1** shows the total energy fluctuation per atom during the molecular dynamics simulations of the Janus PtXY materials at 300 K, accompanied by the snapshots of structures after heating for 10 ps. It is seen that the fluctuation of total energy per atom stays within a cramped scale during the simulations. There are no distinguishable structure deformations or broken bonds when heating finished. Furthermore, Tao *et al.* [1] have examined the thermal stabilities of Janus PtXY at higher temperatures of 600 K and 900 K. These indicate that the Janus PtXY materials are thermally favorable.

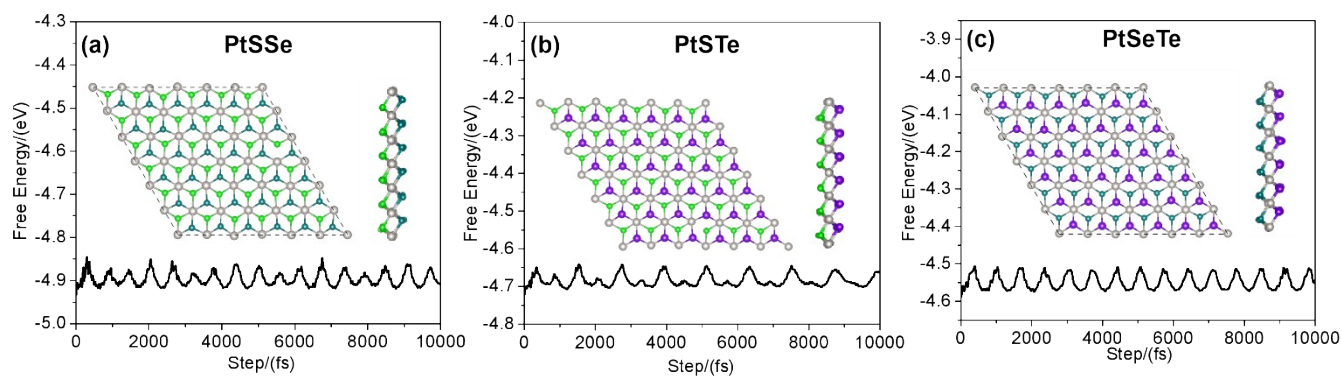

**Fig. S1** The results of molecular dynamics simulations of the MLs Janus PtSSe (a), PtSTe (b) and (c) PtSeTe, with the free energy fluctuations as a function of the time step at 300 K. The grey, green, cyan and purple balls are represented for the Pt, S, Se and Te atoms, respectively.

---

## 1.2 Mechanical stability

We consider the mechanical stabilities of the ML Janus PtXY by employing the linear-elastic constants  $C_{ij}$ . It is known that for a mechanically stable 2D material, the elastic constants should obey the Born criteria [2]:  $C_{11}C_{22} - C_{12}^2 > 0$ , and  $C_{66} > 0$ . As listed in **Table S1**, we find that the criteria has been satisfied well for the ML Janus PtXY, indicative of its good mechanical stability.

**Table S1** The linear-elastic coefficients  $C_{ij}$  of the ML Janus PtXY.

|        | $C_{11}$ (N/m) | $C_{22}$ (N/m) | $C_{12}$ (N/m) | $C_{66}$ (N/m) |
|--------|----------------|----------------|----------------|----------------|
| PtSSe  | 77.72          | 77.72          | 20.61          | 28.73          |
| PtSTe  | 65.41          | 65.41          | 17.28          | 24.11          |
| PtSeTe | 65.90          | 65.90          | 17.85          | 23.90          |

**Table S2** Calculated lattice constants ( $a = b$ ), thickness ( $h$ ), bond length ( $D_{\text{Pt-X}}$  and  $D_{\text{Pt-Y}}$ ), the electrostatic energy difference between two surfaces ( $\Delta\Phi$ ), dipole moment ( $\mu$ ) of the ML Janus PtXY (Y heavier than X), and those of the parent PtS<sub>2</sub>, PtSe<sub>2</sub> and PtTe<sub>2</sub> based on GGA-PBE functional.

|                   | $a = b$ (Å) | $h$ (Å) | $D_{\text{Pt-X}}$ (Å) | $D_{\text{Pt-Y}}$ (Å) | $\Delta\Phi$ (eV) | $\mu$ (Debye) |
|-------------------|-------------|---------|-----------------------|-----------------------|-------------------|---------------|
| PtS <sub>2</sub>  | 3.57        | 2.46    | 2.40                  | 2.40                  | -                 | -             |
| PtSe <sub>2</sub> | 3.75        | 2.62    | 2.53                  | 2.53                  | -                 | -             |
| PtTe <sub>2</sub> | 4.02        | 2.78    | 2.71                  | 2.71                  | -                 | -             |
| PtSSe             | 3.66        | 2.54    | 2.43                  | 2.50                  | 0.72              | 0.22          |
| PtSTe             | 3.81        | 2.62    | 2.50                  | 2.63                  | 1.52              | 0.48          |
| PtSeTe            | 3.89        | 2.70    | 2.59                  | 2.65                  | 0.74              | 0.24          |

## 2. Band gaps of Janus PtXY

When the SOC effect is considered, the position of CBM (VBM) will be shifted downwards (upwards) by around 0.1~0.15 eV from PBE functional (see **Table S3**) and HSE06 functional [3], which provides little influence on the band edges of Janus PtXY. It is noted that the  $G_0W_0$  calculations require expensive computational resources, thus the SOC effect is not considered in our  $G_0W_0$  calculations.

**Table S3** Corresponding electronic properties of the ML Janus PtXY, including the band gaps based on PBE functional with SOC effect ( $E_{PBE}^{w/SOC}$ ) and without SOC effect ( $E_{PBE}^{wo/SOC}$ ), indirect band gaps ( $E_{HSE06}^i$ ) and direct band gaps ( $E_{HSE06}^d$ ) at HSE06 level, indirect quasiparticle band gaps ( $E_{QP}^i$ ) and direct quasiparticle band gaps ( $E_{QP}^d$ ), optical band gaps ( $E_{opt}$ ) using  $G_0W_0$  + BSE method, energy positions of BGC ( $E_{BGC}$ ), positions of CBM and VBM ( $E_{CBM}$  and  $E_{VBM}$ ) based on  $E_{QP}^i$ , as well as the preliminary verification whether the materials can photocatalytically conduct overall water splitting reactions (OP), and Y and N respectively represent for can and cannot. All the results are in eV.

|                   | $E_{PBE}^{w/SOC}$ | $E_{PBE}^{wo/SOC}$ | $E_{HSE06}^i$ | $E_{HSE06}^d$ | $E_{QP}^i$ | $E_{QP}^d$ | $E_{opt}$ | $E_{BGC}$ | $E_{CBM}$ | $E_{VBM}$ | OP |
|-------------------|-------------------|--------------------|---------------|---------------|------------|------------|-----------|-----------|-----------|-----------|----|
| PtS <sub>2</sub>  | 1.72              | 1.71               | 2.58          | 2.70          | 2.96       | 3.11       | 2.45      | -5.51     | -4.03     | -6.99     | Y  |
| PtSe <sub>2</sub> | 1.18              | 1.31               | 1.94          | 2.14          | 2.11       | 2.36       | 1.92      | -5.10     | -4.05     | -6.16     | Y  |
| PtTe <sub>2</sub> | 0.34              | 0.68               | 1.13          | 1.49          | 1.32       | 1.69       | 1.39      | -4.45     | -3.79     | -5.11     | N  |
| PtSSe             | 1.33              | 1.47               | 2.21          | 2.35          | 2.43       | 2.58       | 2.02      | -5.62     | -4.41     | -6.84     | Y  |
| PtSTe             | 0.71              | 0.86               | 1.50          | 1.86          | 1.66       | 2.04       | 1.59      | -5.86     | -5.03     | -6.69     | Y  |
| PtSeTe            | 0.74              | 1.00               | 1.49          | 1.78          | 1.63       | 1.94       | 1.57      | -5.22     | -4.41     | -6.04     | Y  |

### 3. Solar-to-hydrogen efficiency

Assuming 100% efficiency of light absorption and carrier utilization, the STH efficiency ( $\eta_{STH}$ ) is dependent on the light absorption efficiency ( $\eta_{abs}$ ) and the carrier utilization efficiency ( $\eta_{cu}$ ) of the systems, as expressed in equation S1 [4,5]:

$$\eta_{STH} = \eta_{abs} \times \eta_{cu} \quad (S1)$$

Employing the method by Yang's group [4],  $\eta_{abs}$  and  $\eta_{cu}$  can be calculated on basis of the expressions S2 and S3:

$$\eta_{abs} = \frac{\int_{E_g}^{\infty} P(h\omega)d(h\omega)}{\int_0^{\infty} P(h\omega)d(h\omega)} \quad (S2)$$

$$\eta_{cu} = \frac{\Delta G_{H_2O} \int_E^{\infty} \frac{P(h\omega)}{h\omega} d(h\omega)}{\int_{E_g}^{\infty} P(h\omega)d(h\omega)} \quad (S3)$$

where  $\Delta G = 1.23$  eV is the potential difference for water splitting,  $P(h\omega)$  is the AM1.5 solar energy flux at a photon energy of  $h\omega$  and  $E$  represents the energy of photons that can be actually used for water splitting. The way of selecting  $E$  is described in expression S4, and  $\Delta E_1$  and  $\Delta E_2$  are equal to  $\chi_2$  and  $\chi_1$  in our descriptions, respectively.

$$E = \begin{cases} E_g, (\Delta E_1 \geq 0.6eV, \Delta E_2 \geq 0.2eV) \\ E_g + 0.6 - \Delta E_1, (\Delta E_1 < 0.6eV, \Delta E_2 \geq 0.2eV) \\ E_g + 0.2 - \Delta E_2, (\Delta E_1 \geq 0.6eV, \Delta E_2 < 0.2eV) \\ E_g + 0.8 - \Delta E_1 - \Delta E_2, (\Delta E_1 < 0.6eV, \Delta E_2 < 0.2eV) \end{cases} \quad (S4)$$

Besides, in the above expressions,  $E_g$  is the band gap at HSE06 level. Taking the existence of  $\Delta\Phi$  into consideration, the expression S5 is used to acquire the corrected STH efficiency ( $\eta'_{STH}$ ), where  $\Delta V$  is equal to  $\Delta\Phi$  here. Based on the above details, the light absorption efficiency  $\eta_{abs}$ , carrier utilization efficiency  $\eta_{cu}$ , and STH efficiency  $\eta_{STH}$ , as well as the corrected STH efficiency  $\eta'_{STH}$  of ML Janus PtXY are calculated and listed in **Table S4**.

$$\eta'_{STH} = \eta_{STH} \times \frac{\int_0^{\infty} P(h\omega) d(h\omega)}{\int_0^{\infty} P(h\omega) d(h\omega) + \Delta V \int_{E_g}^{\infty} \frac{P(h\omega)}{h\omega} d(h\omega)} \quad (S5)$$

**Table S4** Calculated energy conversion efficiency of light absorption ( $\eta_{\text{abs}}$ ), carrier utilization ( $\eta_{\text{cu}}$ ), STH ( $\eta_{\text{STH}}$ ), and corrected STH ( $\eta'_{\text{STH}}$ ) of the ML Janus PtXY, as well as those of Janus MXY [5] and MoS<sub>2</sub>/WS<sub>2</sub>.

|                  | $\eta_{\text{abs}}$ (%) | $\eta_{\text{cu}}$ (%) | $\eta_{\text{STH}}$ (%) | $\eta'_{\text{STH}}$ (%) |
|------------------|-------------------------|------------------------|-------------------------|--------------------------|
| PtSSe            | 27.9                    | 46.0                   | 12.8                    | 11.9                     |
| PtSTe            | 61.5                    | 57.9                   | 35.6                    | 24.7                     |
| PtSeTe           | 62.0                    | 39.5                   | 24.5                    | 20.1                     |
| MoSSe            | 35.7                    | 48.7                   | 17.4                    | 15.7                     |
| MoSTe            | 61.5                    | 46.8                   | 28.8                    | 20.1                     |
| WSSe             | 29.1                    | 31.2                   | 9.1                     | 8.4                      |
| WSTe             | 50.7                    | 34.9                   | 17.7                    | 13.5                     |
| MoS <sub>2</sub> | 30.6                    | 40.6                   | 12.4                    | 12.4                     |
| WS <sub>2</sub>  | 24.2                    | 24.5                   | 5.9                     | 5.9                      |

\* The calculated energy conversion efficiencies will be reduced in the practical applications due to the energy loss and partial recombination of electrons and holes.



For comparison, we calculate the energy conversion efficiencies of the ML Janus MXY [6] and MoS<sub>2</sub>/WS<sub>2</sub>. The band gaps at HSE06 level ( $E_{\text{HSE06}}$ ), energy positions of BGC ( $E_{\text{BGC}}$ ), positions of CBM/VBM ( $E_{\text{CBM}}/E_{\text{VBM}}$ ), overpotentials for HER/OER ( $\chi_1/\chi_2$ ) and electrostatic potential difference ( $\Delta\Phi$ ) of ML Janus MXY and MoS<sub>2</sub>/WS<sub>2</sub> are summarized in **Table S5**. The band alignments are drawn to verify whether Janus MXY and MoS<sub>2</sub>/WS<sub>2</sub> are potential photocatalysts for overall water splitting, as depicted in **Fig. S2**. It is found that Janus MoSSe, MoSTe, WSSe, WSTe and MoS<sub>2</sub>/WS<sub>2</sub> can proceed both HER and OER. Therefore, the energy conversion efficiencies of above six materials are calculated and shown in **Table S4**.

**Table S5** Calculated HSE06 band gaps ( $E_{\text{HSE06}}$ ), energy position of BGC ( $E_{\text{BGC}}$ ), positions of CBM/VBM ( $E_{\text{CBM}}/E_{\text{VBM}}$ ), overpotentials for HER/OER ( $\chi_1/\chi_2$ ) and electrostatic potential difference ( $\Delta\Phi$ ) of ML Janus MXY and MoS<sub>2</sub>/WS<sub>2</sub>. All values are in eV.

|                  | $E_{\text{HSE06}}$ | $E_{\text{BGC}}$ | $E_{\text{CBM}}$ | $E_{\text{VBM}}$ | $\chi_1$ | $\chi_2$ | $\Delta\Phi$ |
|------------------|--------------------|------------------|------------------|------------------|----------|----------|--------------|
| MoSSe            | 2.02               | -5.30            | -4.29            | -6.30            | 0.92     | 0.63     | 0.77         |
| MoSTe            | 1.50               | -5.35            | -4.60            | -6.10            | 1.33     | 0.43     | 1.49         |
| MoSeTe           | 1.70               | -4.88            | -4.03            | -5.63            | 1.13     | -        | 0.72         |
| WSSe             | 2.18               | -4.95            | -3.86            | -6.04            | 1.29     | 0.37     | 0.71         |
| WSTe             | 1.71               | -5.11            | -4.26            | -5.97            | 1.60     | 0.30     | 1.42         |
| WSeTe            | 1.80               | -4.62            | -3.72            | -5.52            | 1.43     | -        | 0.71         |
| MoS <sub>2</sub> | 2.14               | -5.11            | -4.04            | -6.18            | 0.40     | 0.51     | -            |
| WS <sub>2</sub>  | 2.31               | -4.80            | -3.65            | -5.96            | 0.79     | 0.29     | -            |

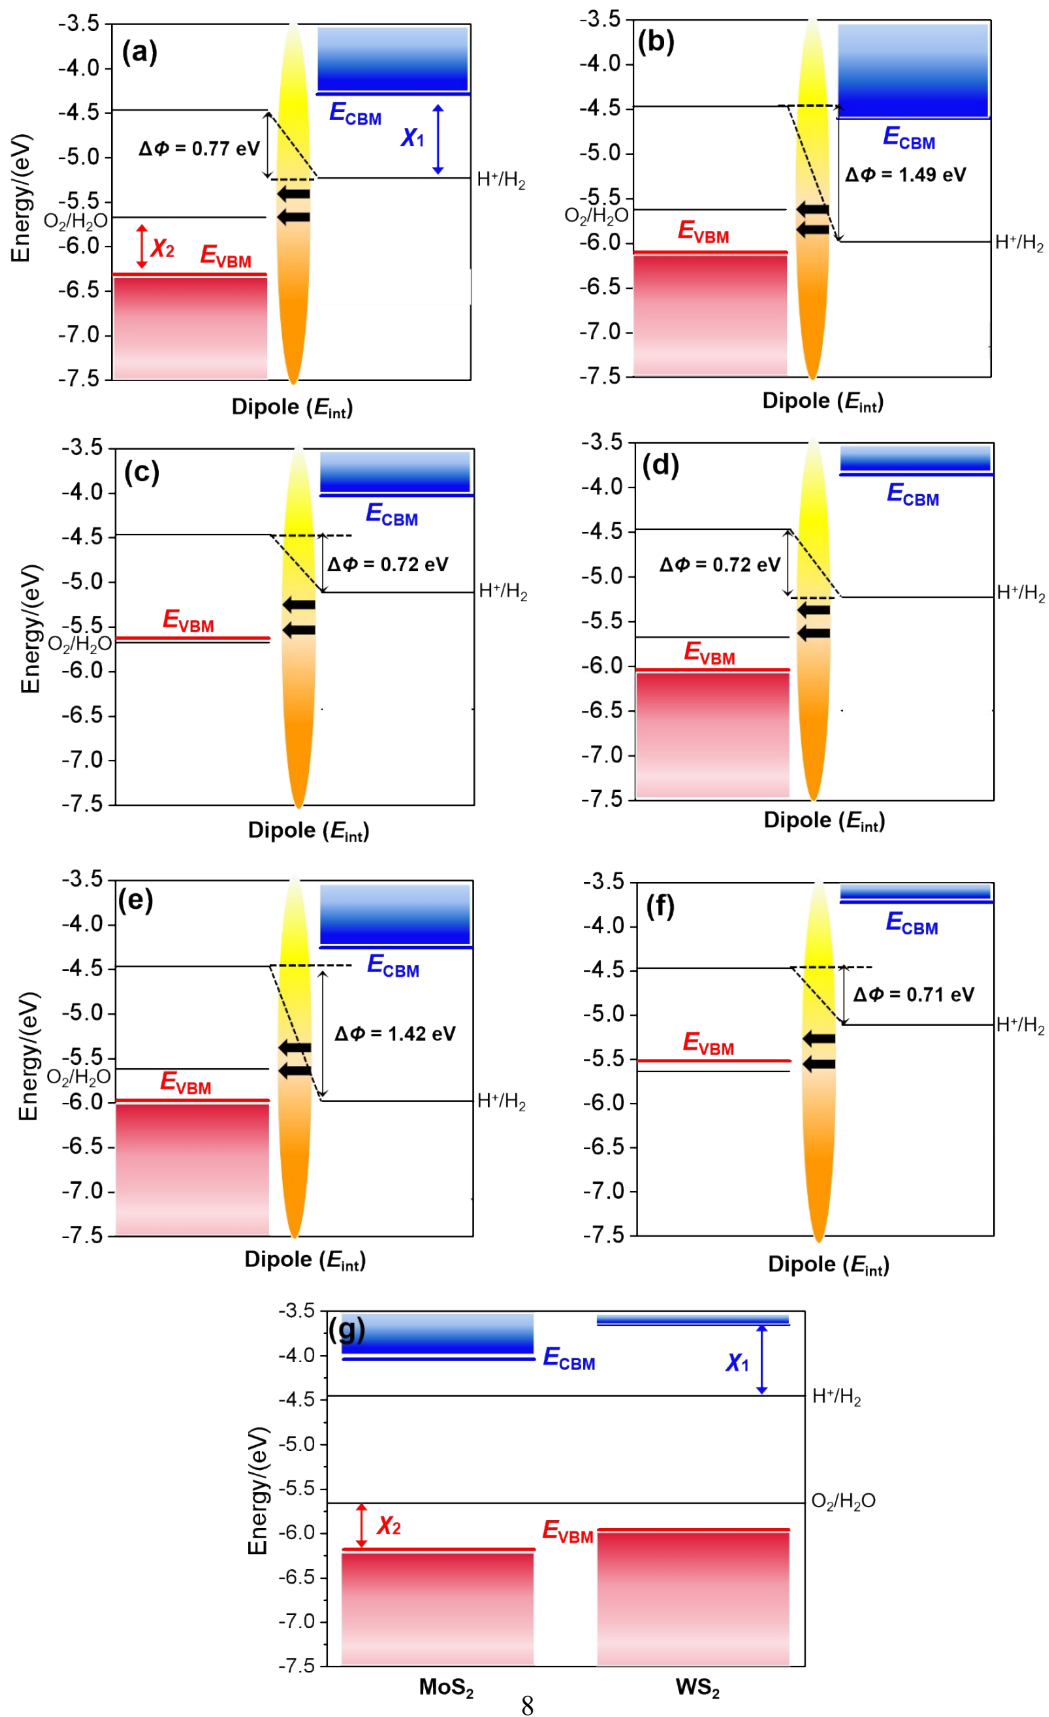

---

**Fig. S2** Band alignments with regarding to the vacuum level of MLs Janus MoSSe (a), MoSTe (b), MoSeTe (c), WSSe (d), WSTe (e), WSeTe (f) and MoS<sub>2</sub>/WS<sub>2</sub> (g).

Devoted to the suitable overpotential for HER  $\chi_1$  and overpotential for OER  $\chi_2$ , the energy conversion efficiencies of carrier utilization are close to 40~60% for Janus PtXY. Correspondingly, the high efficiencies of both light absorption and carrier utilization together ascribe to the high STH energy conversion efficiency  $\eta_{\text{STH}}$  of 35.6% and 24.5% for Janus PtSTe and PtSeTe, respectively. Besides, this  $\eta_{\text{STH}}$  is higher than those of the bilayer C<sub>3</sub>N<sub>5</sub> of 4.54% [7], bilayer LiAlS<sub>2</sub> of 9.97% [8], and Janus MoSSe, WSSe, MoSTe and WSTe of 8.4~15.7% (see **Table S4**), but a bit lower than or comparable to those of bilayers LiAlTe<sub>2</sub> and LiGaSe<sub>2</sub> of respectively 25.34 and 28.68 % [8] and ML B<sub>2</sub>P<sub>6</sub> of 28.2% [9]. Strikingly, the corrected STH conversion efficiency  $\eta'_{\text{STH}}$  of the Janus PtSTe and PtSeTe using the full solar spectrum reaches up to 24.7% and 20.1%, respectively, higher compared with the conventional theoretical limit of 18% [10], which is attributed the success to the relatively small band gaps and good abilities to absorb more visible light for water splitting.

## 4. Details of band alignments

The band alignments of the Janus PtXY are simulated to study their potential for photocatalytically splitting water. The positions of CBM and VBM are defined as follows [11]:

$$E_{CBM} = E_{BGC} - \frac{1}{2}E_{QP}^i \quad (S6)$$

$$E_{VBM} = E_{BGC} + \frac{1}{2}E_{QP}^i \quad (S7)$$

where  $E_{BGC}$  is the band gap center energy with respect to the vacuum level. One advantage of this definition is that  $E_{BGC}$  is negligibly affected by the different functionals used [11]. In this work, GGA-PBE functional is used to obtain  $E_{BGC}$ .

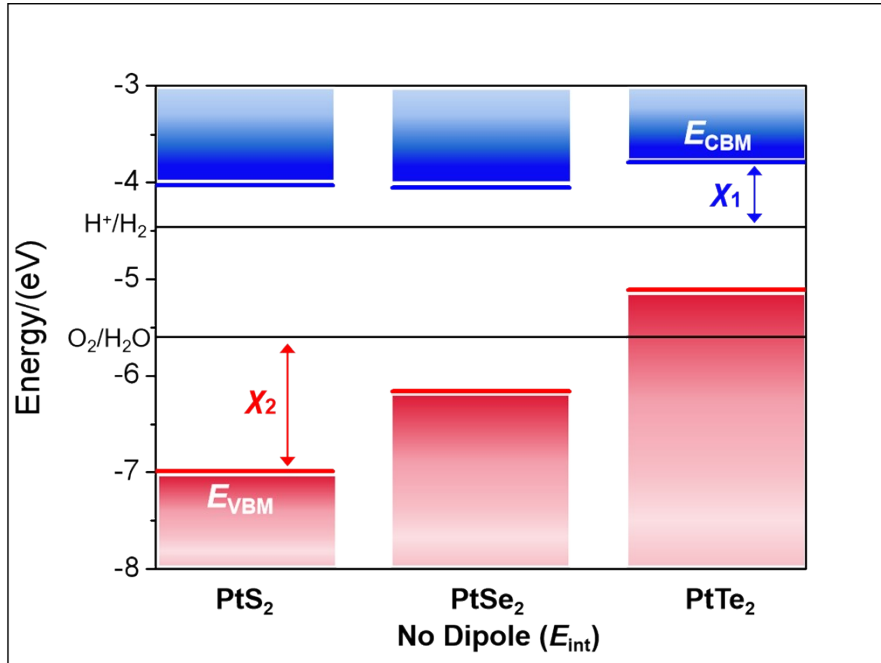

**Fig. S3** Band alignments of bare ML PtX<sub>2</sub>, where  $\chi_1$  and  $\chi_2$  represent the overpotentials for HER and OER, respectively.

## 5. Electrostatic potential of Janus PtXY

It is observed that in ML Janus PtSSe, the S and Se atoms both act electron acceptors of 0.22 and 0.06  $e$  per unit cell, respectively, however, Pt atoms donate the electron of 0.28  $e$ . Similar results can also be found for PtSTe and PtSeTe.

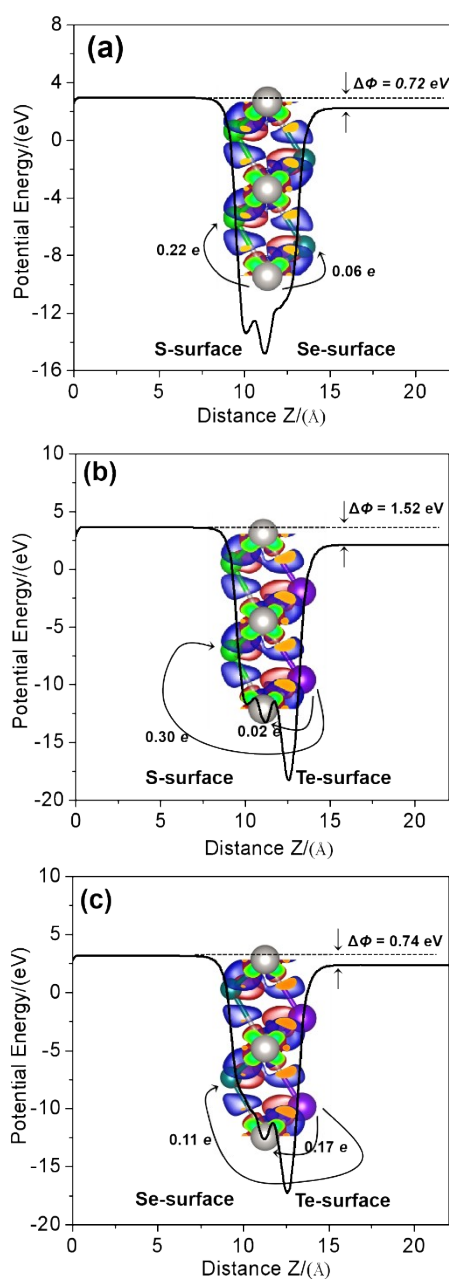

**Fig. S4** Electrostatic potential illustrations along  $z$ -direction and the three-dimensional charge difference densities with the insets representing the Bader charge analysis per unit cell of Janus PtSSe (a), PtSTe (b) and PtSeTe (c), where the blue and red regions represent the electron accumulation and depletion, respectively. The isosurface value is  $0.007 e/\text{\AA}^3$ .

## 6. Exciton Binding Energy

The exciton binding energy ( $E_{EB}$ ) is defined as the energy difference between the direct quasi-particle band gap from  $G_0W_0$  calculations ( $E_{QP}^d$ ) and the first absorption peak of dielectric imaginary part ( $E_{opt}$ ) by  $G_0W_0 + BSE$  approach, as described in the following expression:

$$E_{EB} = (E_{QP}^d - E_{opt}) \quad (\text{S8})$$

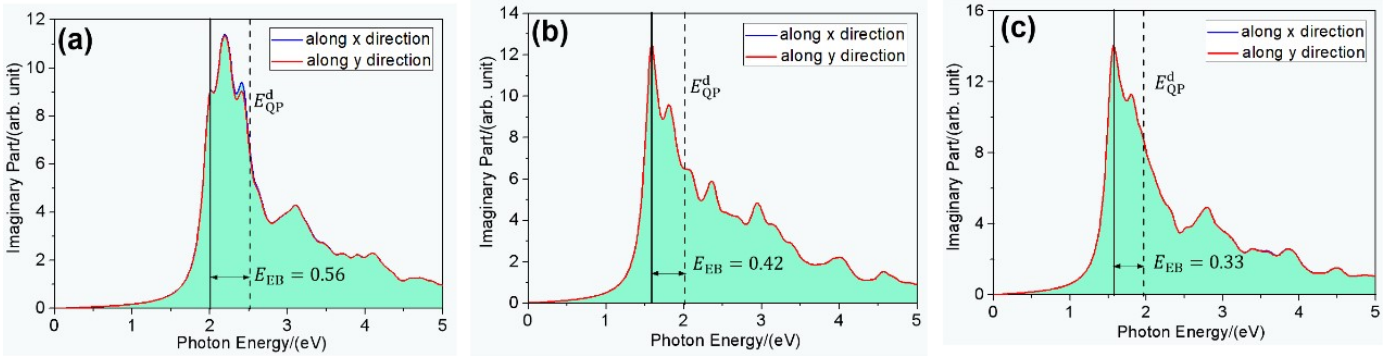

**Fig. S5** The imaginary parts of dielectric functions of Janus PtSSe (a), PtSTe (b) and PtSeTe (c), indicative of the obvious isotropy for the optical response of Janus PtXY.

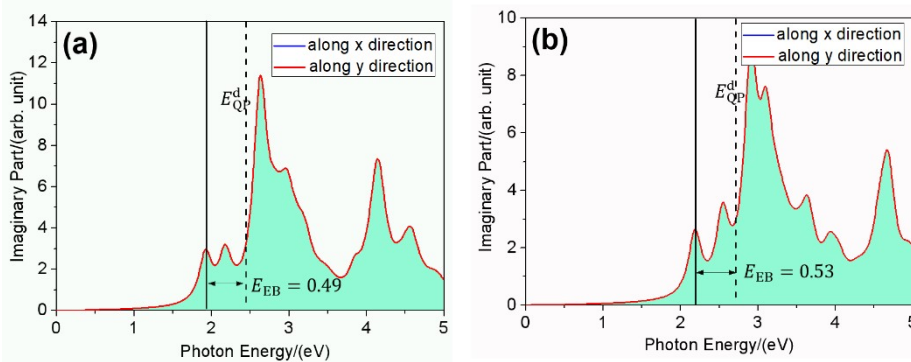

**Fig. S6** The imaginary parts of dielectric functions of MoS<sub>2</sub> (a) and WS<sub>2</sub> (b). It shows that PtSTe and PtSeTe own smaller exciton binding energies compared to MoS<sub>2</sub> and WS<sub>2</sub>.

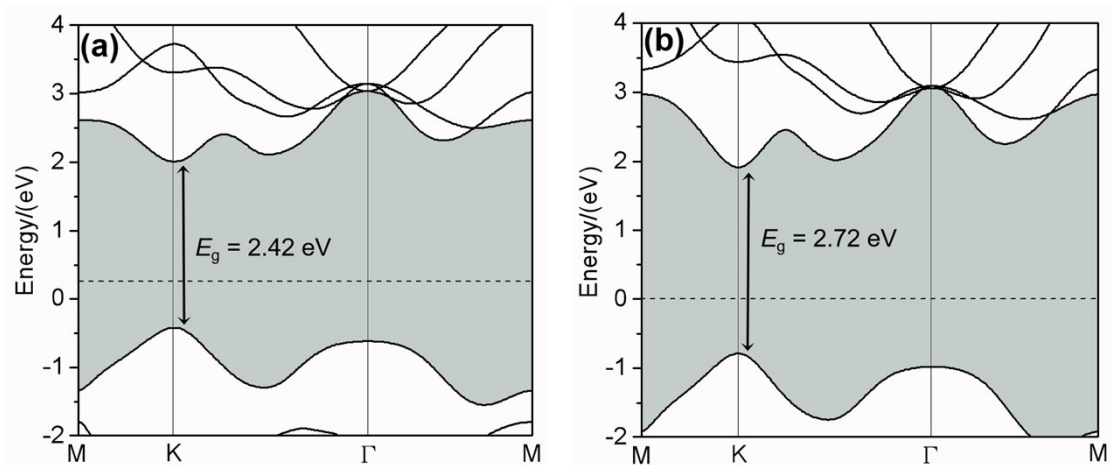

**Fig. S7**  $G_0W_0$  band structures of  $\text{MoS}_2$  (a) and  $\text{WS}_2$  (b). The Fermi level is set to zero level and indicated by black dashed lines. It shows that  $\text{MoS}_2$  and  $\text{WS}_2$  have a direct band gap of 2.42 eV and 2.72 eV, respectively. The band gaps are used to calculate the exciton binding energy combined with Fig. S6.

## 7. Carrier mobility

We calculate the carrier mobility of Janus PtXY via the following equation based on the deformation potential theory (DPT) [12]:

$$\mu = \frac{2eh^3C_{2D}}{3K_B T |m^*|^2 E_d^2} \quad (S9)$$

where the carrier mobility  $\mu_{2D}$  depends on the elastic modulus  $C_{2D}$ , effective mass  $m^*$ , and deformation potential constant  $E_d$ . In addition,  $e$ ,  $\hbar$ ,  $k_B$ , and  $T$  are the electron charge, reduced Planck constant, Boltzmann constant, and the temperature is set at 298.15 K. Herein, the elastic modulus  $C_{2D}$  is defined as  $C_{2D} = (\partial^2 E / \partial \varepsilon^2) / S_0$ , where  $E$  is the total energy and  $S_0$  is the equilibrium area of the optimized 2D structure. The carrier effective mass  $m^*$  is obtained using  $m^* = \pm \hbar^2 (d^2 E_k / dk^2)^{-1}$ . The deformation potential constant  $E_d$  is derived from  $E_d = \partial E_{\text{edge}} / \partial \varepsilon$ , where  $E_{\text{edge}}$  is the band edge energy of the CBM for electrons and VBM for holes induced by the strain  $\varepsilon$ .

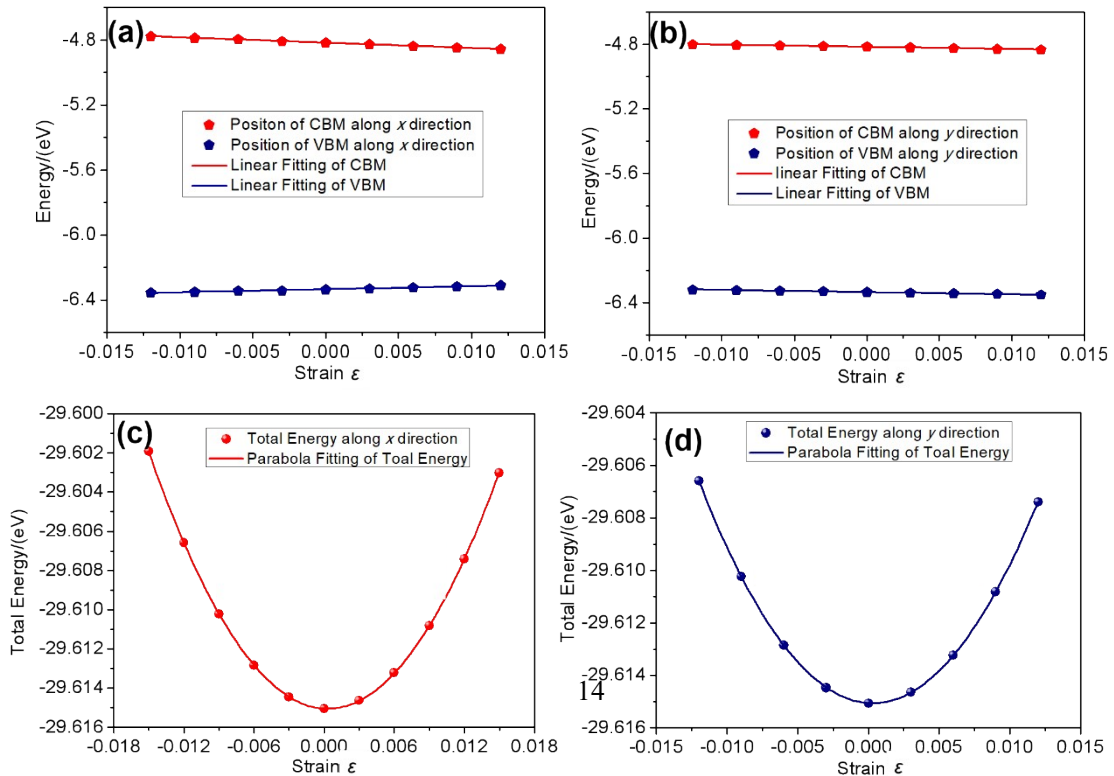



**Fig. S8** Evolution of energy positions of CBM and VBM with respect to the vacuum level when uniaxial strains are employed along the  $x$  direction (a) and  $y$  direction (b) of Janus PtSSe. Total energy of Janus PtSSe in rectangular unit cell as a function of the applied uniaxial strains along  $x$  direction (c) and  $y$  direction (d).

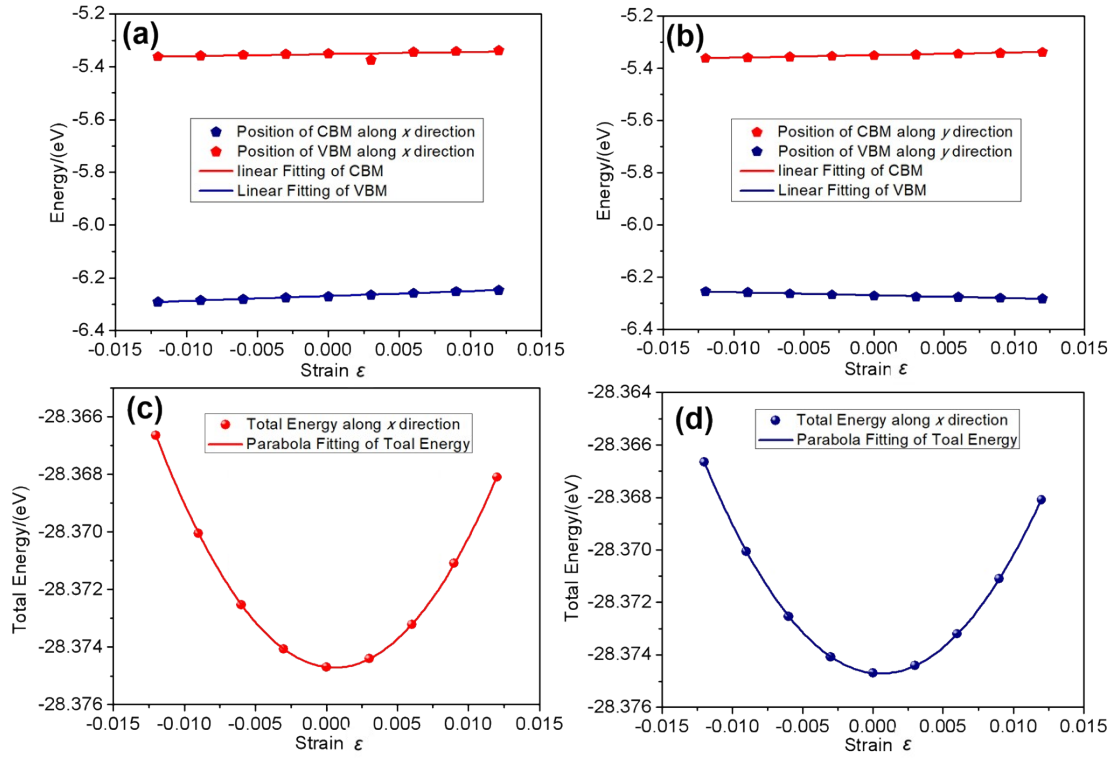

**Fig. S9** Evolution of energy positions of CBM and VBM with respect to the vacuum level when uniaxial strains are employed along the  $x$  direction (a) and  $y$  direction (b) of Janus PtSTe. Total energy of Janus PtSTe in rectangular unit cell as a function of the applied uniaxial strains along  $x$  direction (c) and  $y$  direction (d).

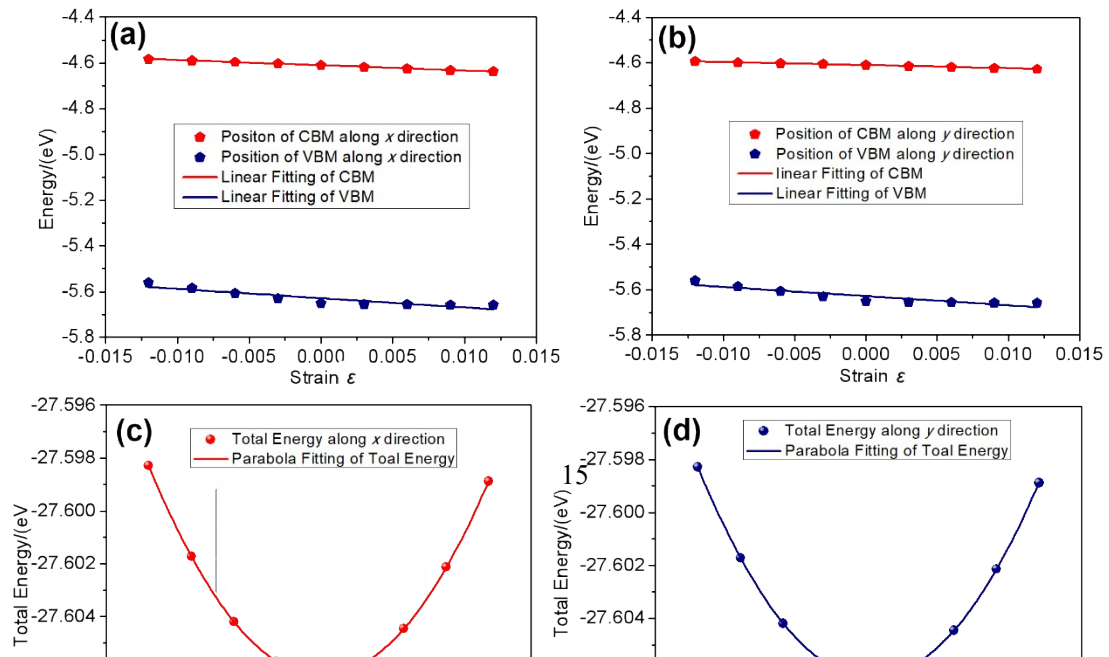

**Fig. S10** Evolution of energy positions of CBM and VBM with respect to the vacuum level when uniaxial strains are employed along the  $x$  direction (a) and  $y$  direction (b) of Janus PtSeTe. Total energy of Janus PtSeTe in rectangular unit cell as a function of the applied uniaxial strains along  $x$  direction (c) and  $y$  direction (d).

**Table S6** Elastic modulus ( $C_{2D}$ ), effective mass ( $m^*$ ), deformation potential ( $E_d$ ) and carrier mobility ( $\mu_{2D}$ ) of Janus PtXY along  $x$  and  $y$  directions.

|        | Carrier type |     | $C_{2D}$ (N m <sup>-1</sup> ) | $m^*$ | $E_d$ (eV) | $\mu_{2D}$ (cm <sup>2</sup> V <sup>-1</sup> s <sup>-1</sup> ) |
|--------|--------------|-----|-------------------------------|-------|------------|---------------------------------------------------------------|
| PtSSe  | Electrons    | $x$ | 77.27                         | 0.28  | 3.30       | 1287.06                                                       |
|        |              | $y$ | 77.24                         | 0.60  | 1.30       | 1805.45                                                       |
|        | Holes        | $x$ | 77.27                         | 1.36  | 1.90       | 164.57                                                        |
|        |              | $y$ | 77.24                         | 3.47  | 1.33       | 51.57                                                         |
| PtSTe  | Electrons    | $x$ | 64.9                          | 1.05  | 0.80       | 1308.03                                                       |
|        |              | $y$ | 64.9                          | 0.81  | 0.97       | 1495.08                                                       |
|        | Holes        | $x$ | 64.9                          | 0.84  | 1.86       | 378.09                                                        |
|        |              | $y$ | 64.9                          | 0.99  | 1.17       | 687.91                                                        |
| PtSeTe | Electrons    | $x$ | 64.9                          | 0.16  | 2.29       | 6874.89                                                       |
|        |              | $y$ | 64.9                          | 0.18  | 1.38       | 14957.94                                                      |
|        | Holes        | $x$ | 64.9                          | 2.96  | 4.05       | 6.42                                                          |
|        |              | $y$ | 64.9                          | 3.38  | 4.04       | 4.95                                                          |

## 8. Adsorption of water molecule

**Table S7** The calculated adsorption energies ( $E_{\text{ads}}$ ) of H<sub>2</sub>O molecule on the different surfaces of the Janus PtXY and the vertical distances between surfaces of PtXY and the H<sub>2</sub>O molecule ( $D$ ).

|        |            | $E_{\text{ads}}/(\text{eV})$ | $D/\text{\AA}$ |
|--------|------------|------------------------------|----------------|
| PtSSe  | S-surface  | -0.232                       | 2.19           |
|        | Se-surface | -0.208                       | 2.63           |
| PtSTe  | S-surface  | -0.256                       | 2.16           |
|        | Te-surface | -0.223                       | 2.65           |
| PtSeTe | Se-surface | -0.246                       | 2.23           |
|        | Te-surface | -0.233                       | 2.58           |

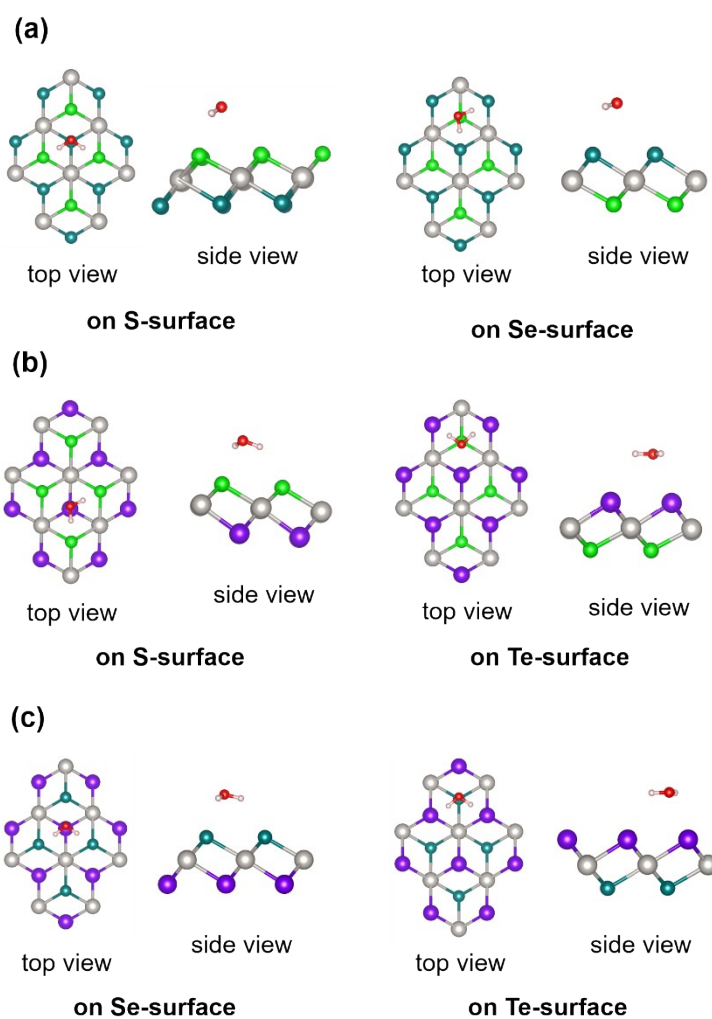

**Fig. S11** The stable configurations with H<sub>2</sub>O adsorption on the Janus PtSSe (a), PtSTe (b) and PtSeTe (c).

## 9. Gibbs free energy

At pH = 0, the Gibbs free energy difference ( $\Delta G$ ) from one step to next step involved in the photocatalytic redox reactions without the light irradiation can be defined as below [13]:

$$\Delta G = \Delta E + \Delta E_{ZPE} - T\Delta S \quad (\text{S10})$$

The complex four-step OER process is considered herein, which are presented step by step as follows:

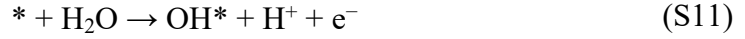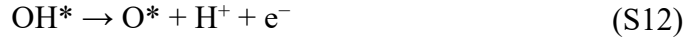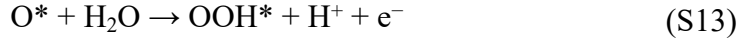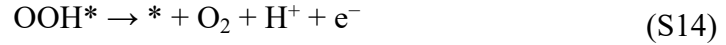

As for the HER process, it can be described in the following steps:

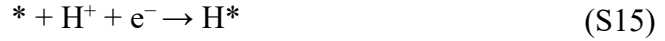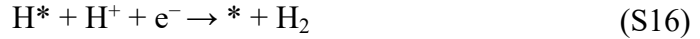

where \* represents the substrate materials for the adsorptions (*i.e.*, Janus PtXY), and O\*, OH\*, OOH\* and H\* represent the adsorbed intermediates during the redox reactions.

The Gibbs free energy difference of each step included in the OER and HER processes is available based on the following expressions, in which the impact of external potential and pH is taken into account:

$$\Delta G_1 = G_{\text{OH}^*} + \frac{1}{2}G_{\text{H}_2} - G_{\text{H}_2\text{O}} - G_* + \Delta G_U - \Delta G_{\text{pH}} \quad (\text{S17})$$

$$(\text{S18})$$

$$\Delta G_2 = G_{\text{O}^*} + \frac{1}{2}G_{\text{H}_2} - G_{\text{OH}^*} + \Delta G_U - \Delta G_{\text{pH}} \quad (\text{S19})$$

$$\Delta G_3 = G_{OOH^*} + \frac{1}{2}G_{H_2} - G_{O^*} - G_{H_2O} + \Delta G_U - \Delta G_{pH}$$

$$\Delta G_4 = G_{*} + G_{O_2} + \frac{1}{2}G_{H_2} - G_{OOH^*} + \Delta G_U - \Delta G_{pH} \quad (S20)$$

$$\Delta G_5 = G_{H^*} - G_{*} - \frac{1}{2}G_{H_2} + \Delta G_U + \Delta G_{pH} \quad (S21)$$

$$\Delta G_6 = G_{*} + \frac{1}{2}G_{H_2} - G_{H^*} + \Delta G_U + \Delta G_{pH} \quad (S22)$$

For the values of  $U_h (U_e)$  at pH = 0, taking PtSSe as an example, the energy position of VBM (CBM) is -6.84 (-4.41) eV (see Table S3), and  $U_h (U_e)$  is defined as the energy difference between the VBM (CBM) and the reduction potential (-4.44 eV), thus  $U_h = -4.44 - (-6.84) = 2.40$  V,  $U_e = (-4.41) - (-4.44 - 0.72) = 0.75$  V for PtSSe, and the values of  $U_h (U_e)$  of PtSTe and PtSeTe can be obtained using the similar method.

The external potentials provided by the photogenerated electrons and holes between pH = 0 and pH  $\neq$  0 can be written in the following equations [14,15]:

$$U_e^{pH} = U_e^{pH=0} - pH \times 0.059 \quad (S23)$$

$$U_h^{pH} = U_h^{pH=0} + pH \times 0.059 \quad (S24)$$

From **Table S3** and **Fig. 3**,  $U_h^{pH=0} (U_h^{pH=7})$  of ML Janus PtSSe is 2.40 (2.82) V. Correspondingly, the  $U_e^{pH=0} (U_e^{pH=7})$  of the ML Janus PtSSe is 0.75 (0.33) V. Using the same method,  $U_h^{pH=0} (U_h^{pH=7})$  and  $U_e^{pH=0} (U_e^{pH=7})$  provided by the photogenerated holes and electrons of the MLs Janus PtSTe and PtSeTe are calculated to be 2.25 (2.67) and 0.93 (0.51) V, and 1.60 (2.02) and 0.77 (0.35) V, respectively.

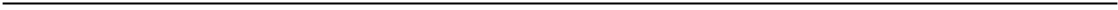

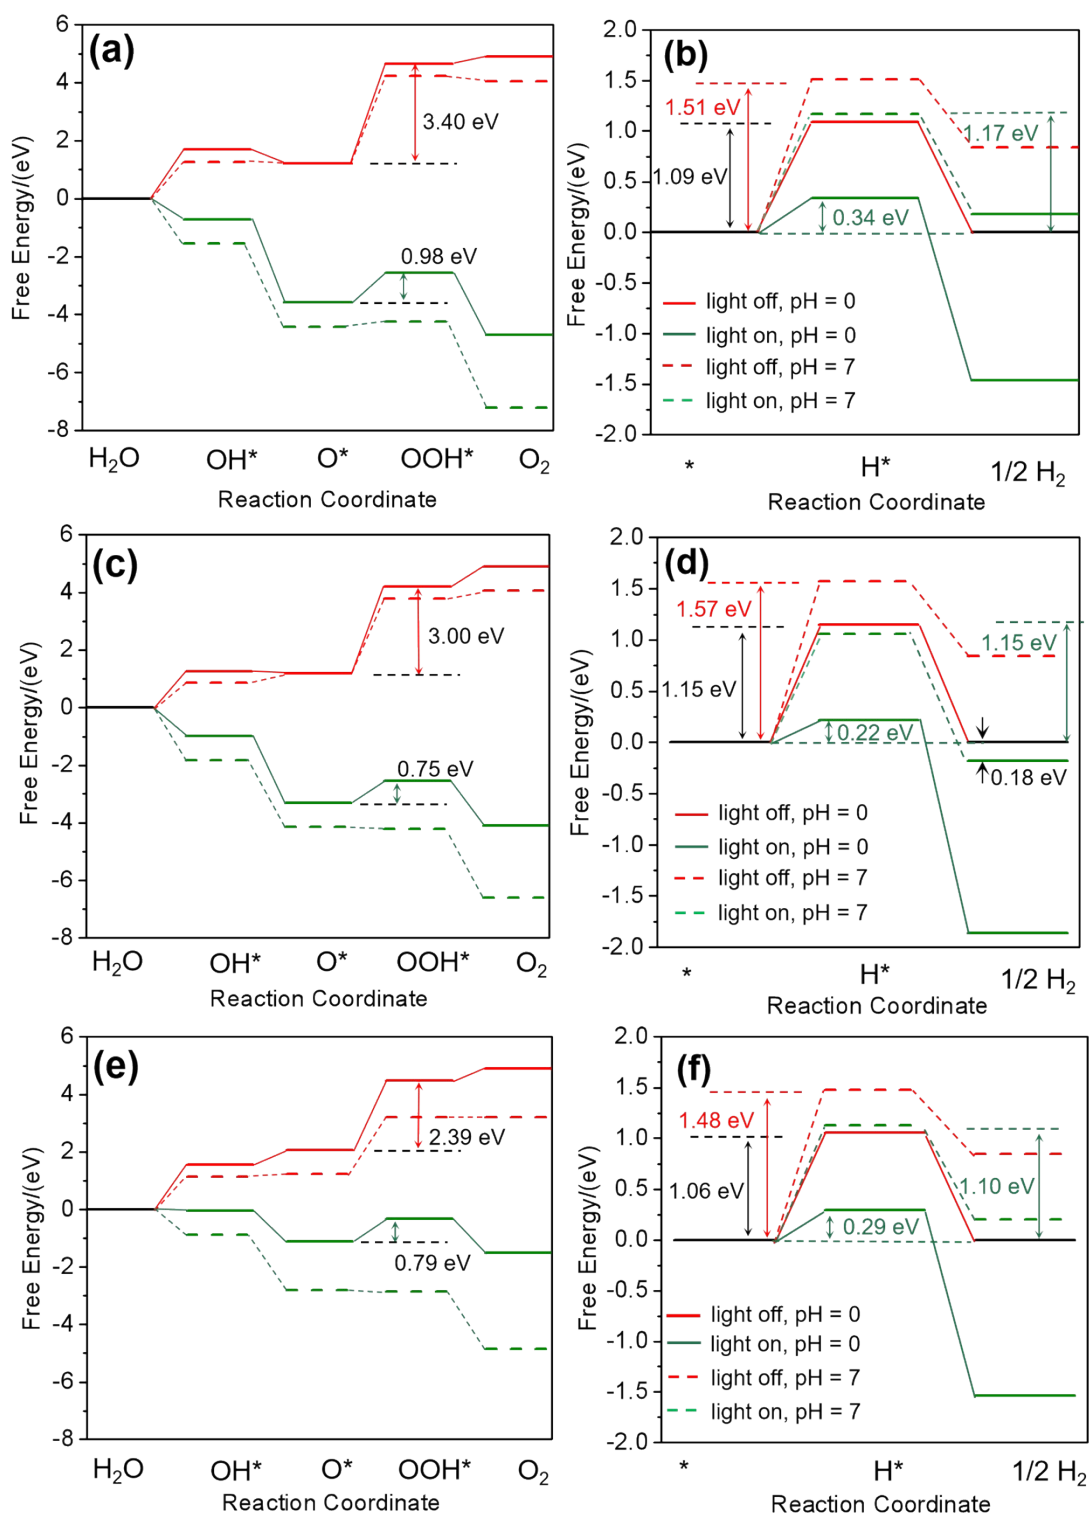

**Fig. S12** Comparison of free energy steps of OER and HER processes at pH = 0 and pH = 7 on the MLs Janus PtSSe (a-b), PtSTe (c-d) and PtSeTe (e-f).

---

## 10. Theoretical calculation models

A hybrid exchange–correlation functional is usually constructed as a linear combination of the Hartree–Fock exact exchange functional and any number of exchange and correlation explicit density functionals.

$$E_x^{\text{HF}} = -\frac{1}{2} \sum_{i,j} \iint \psi_i^*(\mathbf{r}_1) \psi_j^*(\mathbf{r}_2) \frac{1}{r_{12}} \psi_j(\mathbf{r}_1) \psi_i(\mathbf{r}_2) d\mathbf{r}_1 d\mathbf{r}_2 \quad (1)$$

The HSE (Heyd–Scuseria–Ernzerhof) exchange–correlation functional uses an error-function-screened Coulomb potential to calculate the exchange portion of the energy in order to improve computational efficiency, especially for metallic systems:

$$E_{xc}^{\omega\text{PBEh}} = \alpha E_x^{\text{HF,SR}}(\omega) + (1-\alpha) E_x^{\text{PBE,SR}}(\omega) + E_x^{\text{PBE,LR}}(\omega) + E_c^{\text{PBE}} \quad (2)$$

where  $\alpha$  is the mixing parameter, and  $\omega$  is an adjustable parameter controlling the short-rangeness of the interaction. Standard values of  $\alpha = 1/4$  and  $\omega = 0.2$  (usually referred as to HSE06) have been shown to give good results for most systems.  $E_x^{\text{HF,SR}}(\omega)$  is the short-range Hartree–Fock exact exchange functional,  $E_x^{\text{PBE,SR}}(\omega)$  and  $E_x^{\text{PBE,LR}}(\omega)$  are the short- and long-range components of the PBE exchange functional, and  $E_c^{\text{PBE}}(\omega)$  is the PBE correlation functional.

As for the GW method [16], employing the energies  $\epsilon_n$  and the orbitals  $\phi_n$ , which solve the Kohn–Sham equations of DFT, an initial Green’s function  $G^{(0)}$  can be constructed [17,18]:

$$G_0(\mathbf{r}, \mathbf{r}', z) = \sum_{n=1}^N \frac{\phi_n(\mathbf{r}) \bar{\phi}_n(\mathbf{r}')}{z - \epsilon_n + i\eta \text{sgn}(\epsilon_n - \mu)} \quad (3)$$

The self-energy in  $G_0W_0$  reads:

$$\hat{\Sigma}_{G_0W_0}(12) = iG_0(12^+)W_0(12^+) \quad (4)$$

A representation in energy space is employed by performing a Fourier transformation:

$$\hat{\Sigma}_{G_0W_0}(\mathbf{r}, \mathbf{r}', z) = \frac{i}{2\pi} \int dE' G_0(\mathbf{r}, \mathbf{r}', z - E') W_0(\mathbf{r}, \mathbf{r}', E') e^{(-i\delta E')} \quad (5)$$

From this self-energy, the external potential  $\hat{V}_{\text{ext}}$  from the ions, and the Hartree potential



$\hat{V}_H[G_0]$  an energy-dependent non-interacting effective potential  $V_{GW}(z)$  is constructed as follows:

$$V_{GW}(z) = V_{\text{ext}} + V_H[G_0] + \Sigma(z) \quad (6)$$

The potential  $\hat{V}_H[G_0]$  is calculated from the electron density of  $G_0$ , respectively the underlying non-interacting system. With the potential  $V_{GW}(z)$  the  $G_0W_0$  approach can be understood as a prescript which generates an energy dependent perturbative correction  $\Delta V(z)$  to the exchange-correlation potential  $\hat{V}_{\text{xc}}$  from DFT given by:

$$\Delta V(z) = \Sigma(z) - \hat{V}_{\text{xc}} \quad (7)$$

Employing this result, the one-body  $G_0W_0$  Green's function  $G_{G_0W_0}$  is given as:

$$G_{G_0W_0}^{-1}(z) = E - H_{G_0W_0}(z) \quad (8)$$

with:

$$H_{G_0W_0}(z) = -\frac{\nabla^2}{2m} + V_{GW}(z) \quad (9)$$

$$= -\frac{\nabla^2}{2m} + V_H + V_{\text{ext}} + \Sigma(z) \quad (10)$$

$$= -\frac{\nabla^2}{2m} + V_H + V_{\text{ext}} + \hat{V}_{\text{xc}} + \Delta V(z) \quad (11)$$

The pole positions of  $G_{G_0W_0}$  respectively the QP-energies  $\varepsilon_n$  are found as solutions of the QP-equation:

$$\left( H_{G_0W_0}(\varepsilon_{n'}) - \varepsilon_{n'} \right) |\psi_n\rangle = 0 \quad (12)$$

with the QP-orbitals  $|\psi_n\rangle$ .

In a simpler flavor of  $G_0W_0$ , one approximates the QP-orbitals with Kohn-Sham states  $\psi_n \approx \phi_n$ . In this spirit, all off-diagonal elements in the QP-equation Eq. (12) are neglected and the QP-energies are calculated from:

$$\varepsilon_{n'} \approx \langle \phi_n | -\frac{\nabla^2}{2m} + V_{\text{ext}} + V_H + \hat{V}_{\text{xc}} + \Delta V(\varepsilon_{n'}) | \phi_n \rangle \quad (13)$$

$$= \langle \phi_n | -\frac{\nabla^2}{2m} + V_{\text{ext}} + V_H + \hat{V}_{\text{xc}} | \phi_n \rangle + \langle \phi_n | \Sigma(\varepsilon_{n'}) - \hat{V}_{\text{xc}} | \phi_n \rangle \quad (14)$$

$$= \varepsilon_n + \langle \phi_n | \Sigma(\varepsilon_{n'}) - \hat{V}_{\text{xc}} | \phi_n \rangle \quad (15)$$

---

with the Kohn-Sham energies  $\epsilon_n$  and the perturbative  $G_0W_0$  correction from (7) which is given for each single energy by the matrix element  $\langle \phi_n | \Sigma(\epsilon_n) - \hat{V}_{xc} | \phi_n \rangle$ .

## References

- [1] W. L. Tao, J. Q. Lan, C. E. Hu, Y. Cheng, J. Zhu and H. Y. Geng, *J. Appl. Phys.*, 2020, **127**, 035101.
- [2] M. Born and K. Huang, *Dynamical Theory of Crystal Lattices*; Clarendon Press. 1954.
- [3] F. Ersan and C. Ataca, *Phys. Rev. Appl.*, 2020, **13**, 064008.
- [4] C. F. Fu, J. Y. Sun, Q. Q. Luo, X. X. Li, W. Hu and J. L. Yang, *Nano Lett.*, 2018, **18**, 6312–6317.
- [5] Q. K. Yin, C. L. Yang, M. S. Wang and X. G. Ma, *J. Mater. Chem. C*, 2021, DOI: 10.1039/d1tc02423j.
- [6] C. X. Xia, W. Q. Xiong, J. Du, T. X. Wang, Y. T. Peng and J. B. Li, *Phys. Rev. B*, 2018, **98**, 165424.
- [7] S. Y. Qi, Y. C. Fan, J. R. Wang, X. H. Song, W. F. Li and M. W. Zhao, *Nanoscale*, 2020, **12**, 310.
- [8] Y. C. Fan, X. H. Song, S. Y. Qi, X. K. Ma and M. W. Zhao, *J. Mater. Chem. A*, 2019, **7**, 26123.
- [9] M. L. Sun and U. Schwingenschlögl, *Chem. Mater.*, 2020, **32**, 4795–4800.
- [10] M. G. Walter, E. L. Warren, J. R. McKone, S. W. Boettcher, Q. Mi, E. A. Santori and N. S. Lewis, *Chem. Rev.*, 2010, **110**, 6446–6473.
- [11] M. C. Toroker, D. K. Kanan, N. Alidoust, L. Y. Isseroff, P. Liao and E. A. Carter, *Phys. Chem. Chem. Phys.*, 2011, **13**, 16644–16654.
- [12] J. Bardeen and W. Shockley, *Phys. Rev.*, 1950, **80**, 72–80.
- [13] J. K. Nørskov, J. Rossmeisl, A. Logadottir and L. Lindqvist, *J. Phys. Chem. B*, 2004, **108**, 17886–17892.
- [14] L. Ju, M. Bie, X. Tang, J. Shang and L. Z. Kou, *ACS Appl. Mater. Interfaces*, 2020, **12**, 29337–29338.

- 
- [15] C. F. Fu, Q. Q. Luo, X. X. Li and J. L. Yang, *J. Mater. Chem. A*, 2016, **4**, 18892–18898.
- [16] M. S. Hybertsen and S. G. Louie, *Phys. Rev. B*, 1986, **34**, 5390–5413.
- [17] R. W. Godby, M. Schluter and L.J. Sham, *Phys. Rev. B*, 1988, **37**, 10159–10175.
- [18] *Rev. Nat. Quasiparticle self-consistent GW-approximation for molecules: [D]*.  
Baden Wuertenberg: Karlsruhe Institute of Technology, 2015.
